# Supplementary material for: Cross-Linked Self-Assembling Peptides and Their Post-Assembly Functionalization via One-Pot and In Situ Gelation System
Source: PubMed Central journal article supplement (PMC7353005; doi:10.3390/ijms21124261), 2020-06-15
Supplement: ijms-21-04261-s001.pdf [file ijms-21-04261-s001.pdf]

## Table of Contents

|                                                                                                                   |           |
|-------------------------------------------------------------------------------------------------------------------|-----------|
| <b>Supplementary Figures</b> .....                                                                                | <b>2</b>  |
| Supplementary Figure S1: EDC/sulfo-NHS cross-linked LDLK12 peptide .....                                          | 2         |
| Supplementary Figure S2: Shear stress ( $\sigma$ ) measurements.....                                              | 2         |
| Supplementary Figure S3: CD spectrum of EDC/sulfo-NHS.....                                                        | 3         |
| Supplementary Figure S4: 2D heights interpolation map.....                                                        | 3         |
| Supplementary Figure S5: Nematic order parameter.....                                                             | 4         |
| Supplementary Figure S6: CD spectra of KLPGWGS and<br>LDLK12_EDC/NHS_KLPGWGS.....                                 | 5         |
| Supplementary Figure S7: FITC-KLPGWGS fluorescence intensity .....                                                | 5         |
| Supplementary Figure S8: HPLC and LC-MS analyses of LDLK12, KLPGWGS and<br>FITC-KLPGWGS .....                     | 8         |
| Supplementary Figure S9: HPLC and LC-MS analyses of cross-linked LDLK12 .....                                     | 9         |
| Supplementary Figure S10: HPLC and LC-MS analyses of LDLK12 post-assembly<br>functionalization with KLPGWGS ..... | 10        |
| <b>References</b> .....                                                                                           | <b>10</b> |

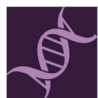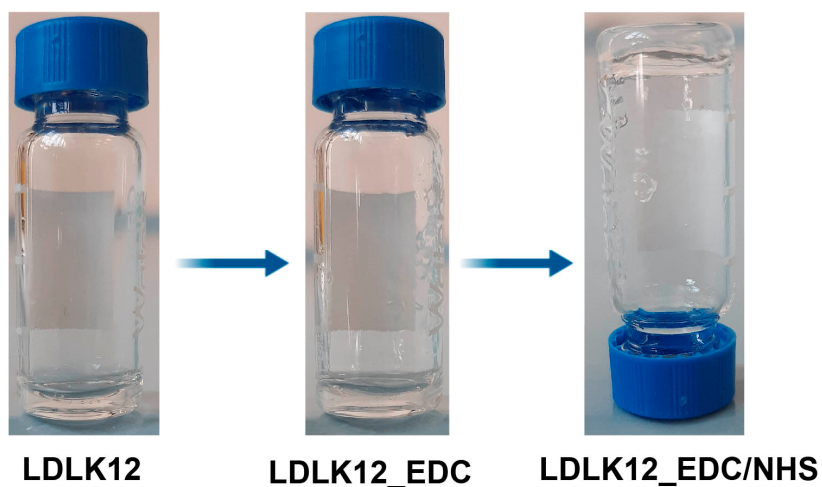

**Supplementary Figure S1: EDC/sulfo-NHS cross-linked LDLK12 peptide.** One-pot *in situ* LDLK12 (1% *w/v*) cross-linking via EDC/sulfo-NHS coupling; after cross-linking the self-supporting SAP scaffold can be appreciated.

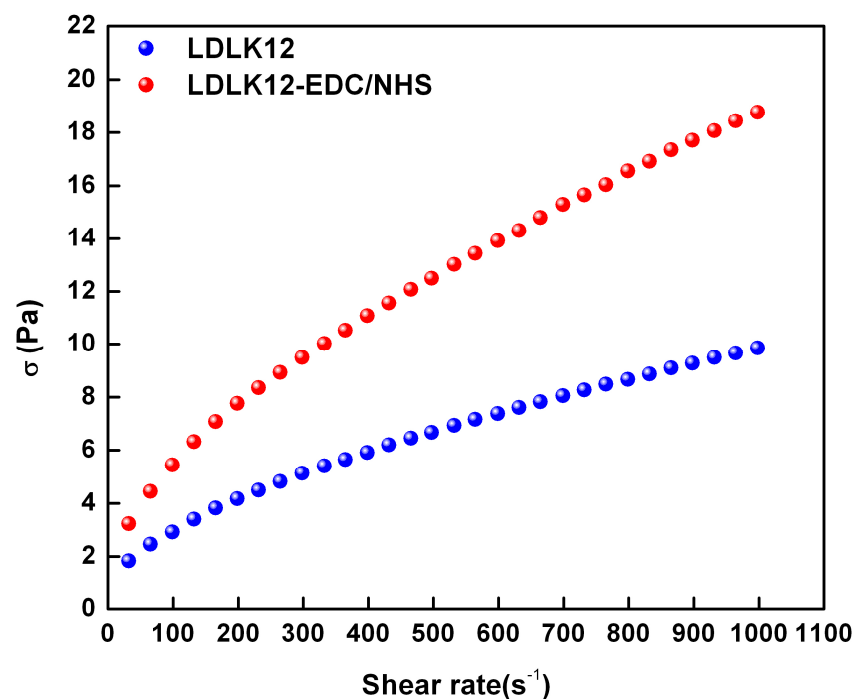

**Supplementary Figure S2: Shear stress ( $\sigma$ ) measurements.** Shear stress ( $\sigma$ ) measurements at increasing shear rate of the wildtype and cross-linked LDLK12 peptides. Both SAPs exhibited non-Newtonian shear-thinning behavior.

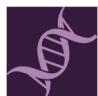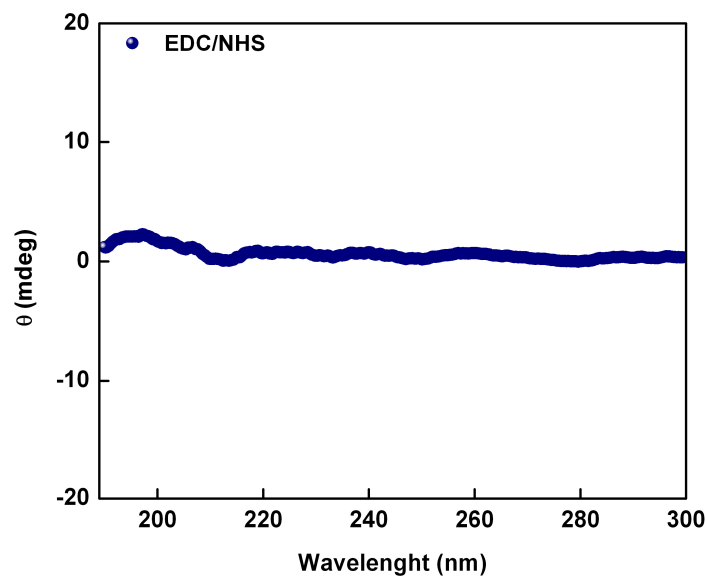

**Supplementary Figure S3: CD spectrum of EDC/sulfo-NHS.** No CD signal was observed in EDC/sulfo-NHS alone, suggesting no assembly propensity for the cross-linker alone.

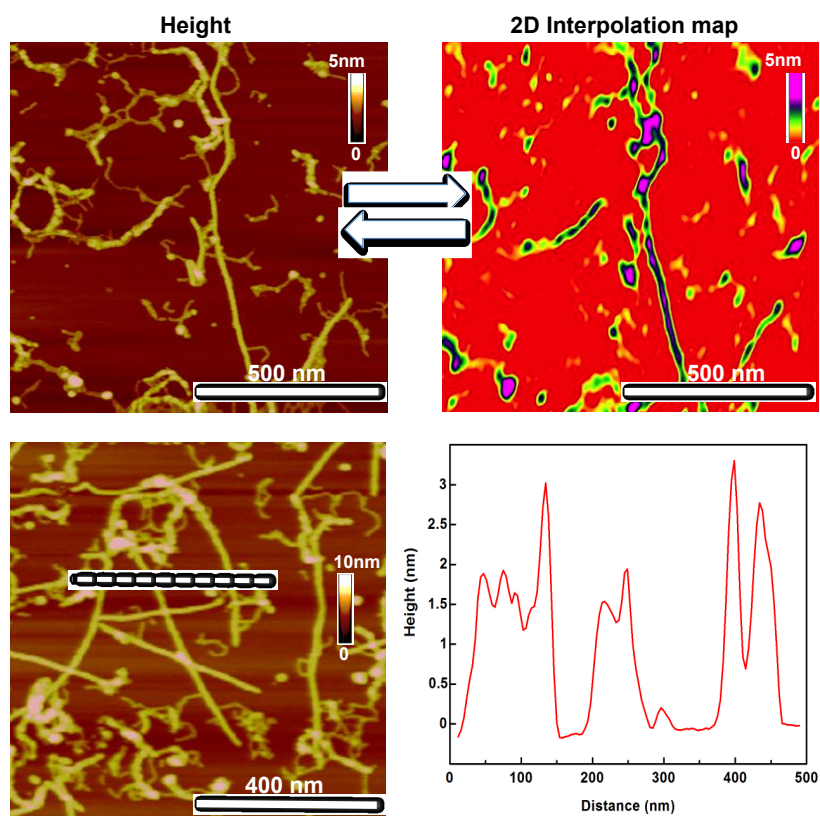

**Supplementary Figure S4: 2D heights interpolation map.** 2D heights interpolation map and height measurements of EDC/sulfo-NHS cross-linked LDLK12 peptide.

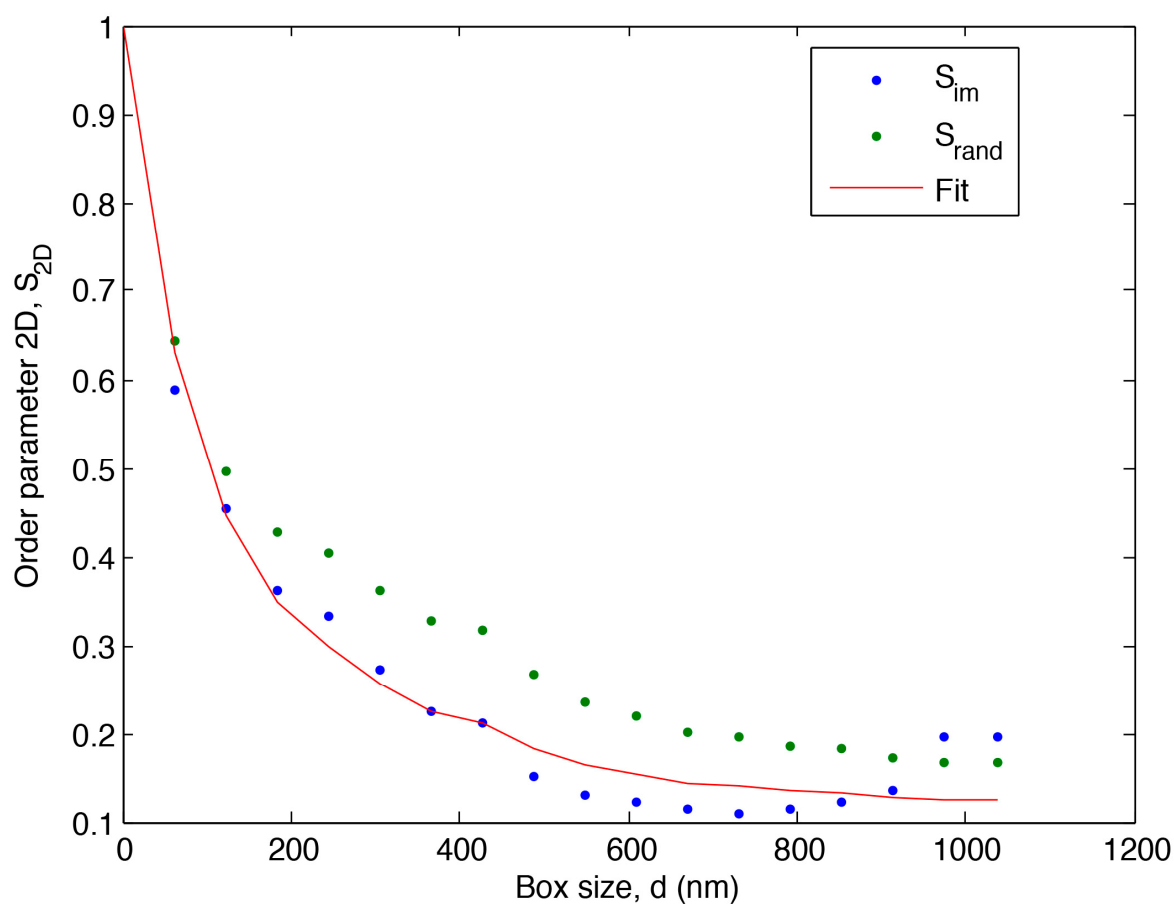

**Supplementary Figure S5: Nematic order parameter.** Nematic order parameter of cross-linked LDLK12 nanostructured scaffold, obtained by FiberApp software [60,61]. To calculate the 2D order parameter (i.e.  $S_{2D}$ ) we divided the whole AFM image into square blocks of a certain size ( $d$ ). Calculating and averaging  $S_{2D}$  values for all blocks results in one mean number, which is parametric with ( $d$ ), yielding to the length scale-dependent  $S_{2D}(d)$ [62].  $S_{2D}(d)$  function is further expressed as sum of the weighted components  $S_{2D}^{\text{align}}$  and  $S_{2D}^{\text{rand}}$ , corresponding to the alignment of the nematic and isotropic components, respectively:  $S_{2D}(d) = aS_{2D}^{\text{align}}(d) + (1 - a) S_{2D}^{\text{rand}}(d)$ ; where  $a$  is the relative surface fraction of the aligned (nematic) domains. By applying this analysis to the tracked nanofibrils, it is possible to quantify isotropic–nematic transitions rigorously.[61, 62].

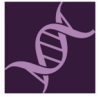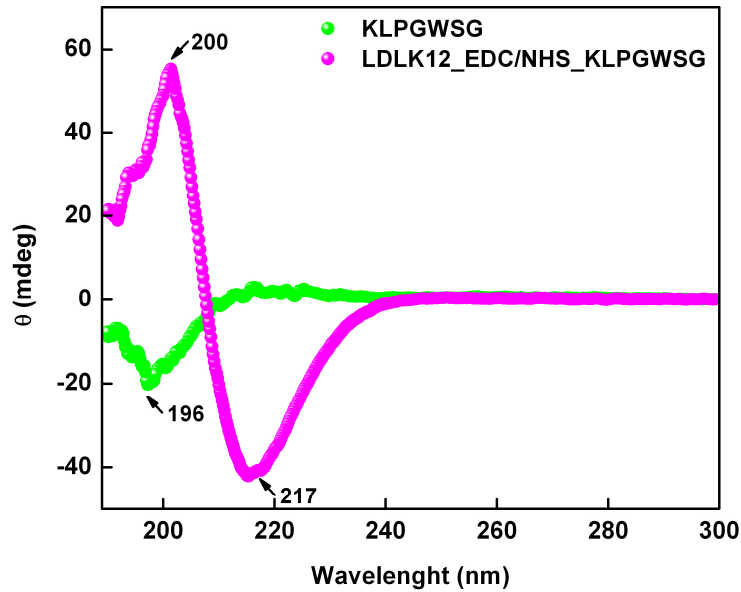

**Supplementary Figure S6: CD spectra of KLPGWSG and LDLK12\_EDC/NHS\_KLPGWSG.** LDLK12 peptide after the EDC/sulfo-NHS reaction with KLPGWSG showed the presence of  $\beta$ -sheet secondary structures, while the KLPGWSG alone showed an unstructured conformation.

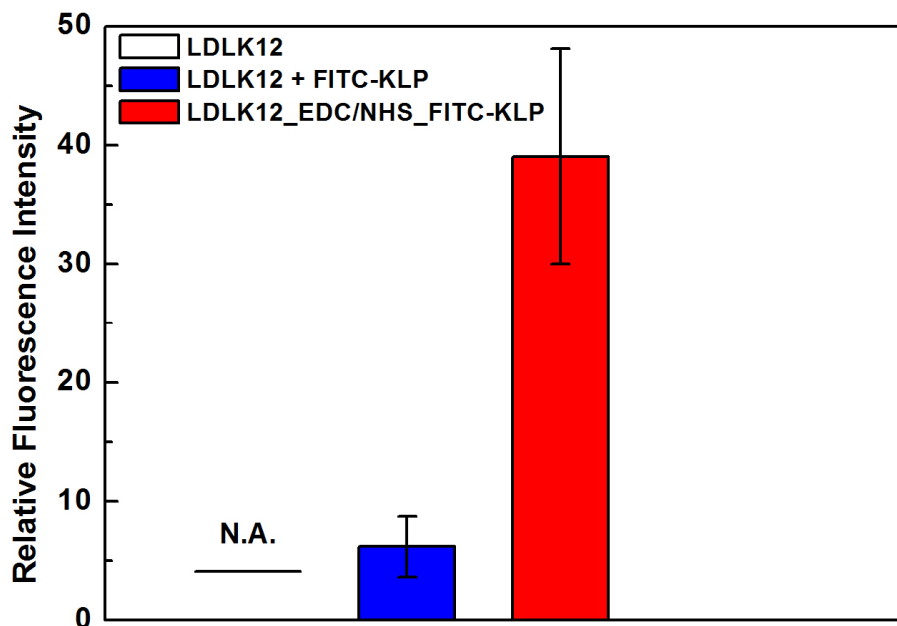

**Supplementary Figure S7: FITC-KLPGWSG fluorescence intensity.** Quantification of FITC-KLPGWSG fluorescence intensity on LDLK12 peptide nanostructures. EDC/sulfo-NHS-mediated conjugation of FITC-KLPGWSG peptide to LDLK12 nanofibers showed higher fluorescence intensity compared to the non-specific adsorption of FITC-KLPGWSG to nanofibers of standard LDLK12. As expected, LDLK12 alone did not show any detectable signal.

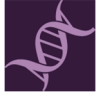

### Ac-LDLKLDLKLKLDLK-CONH<sub>2</sub>

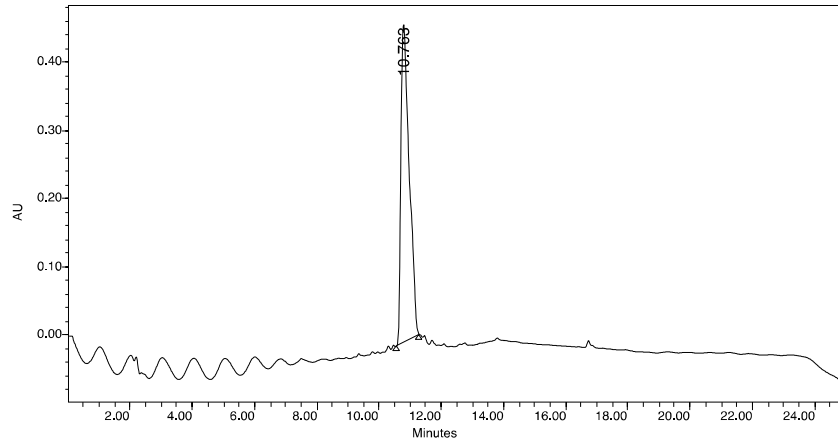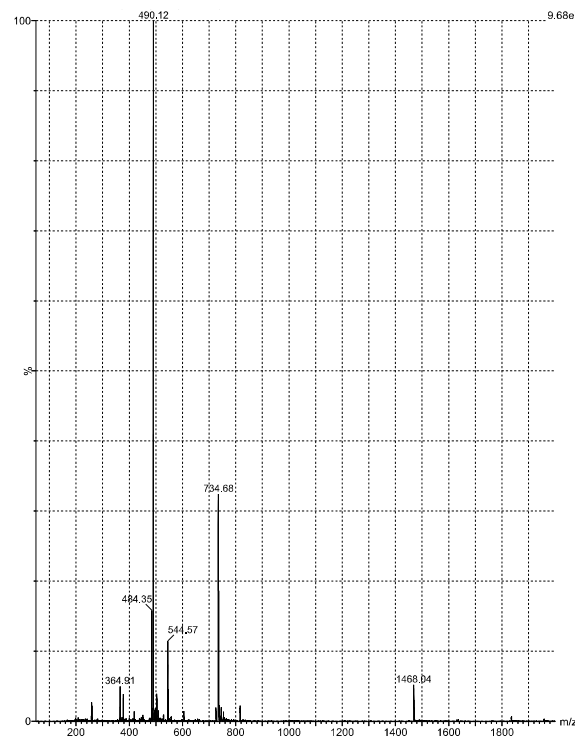

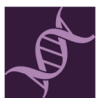

### H<sub>2</sub>N-KLPGWSG-CONH<sub>2</sub>

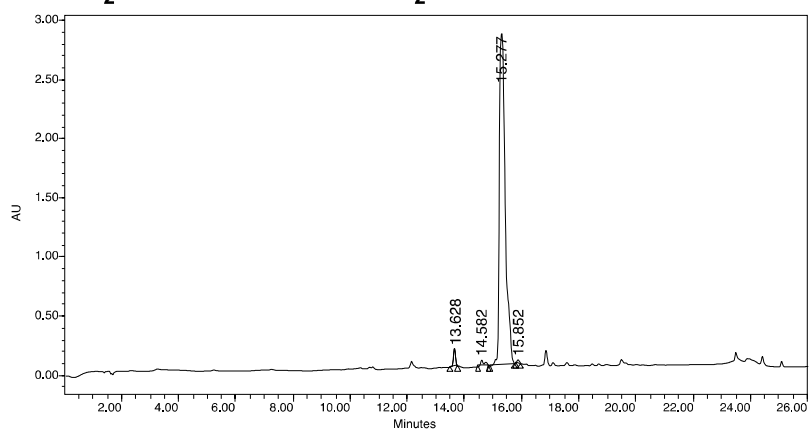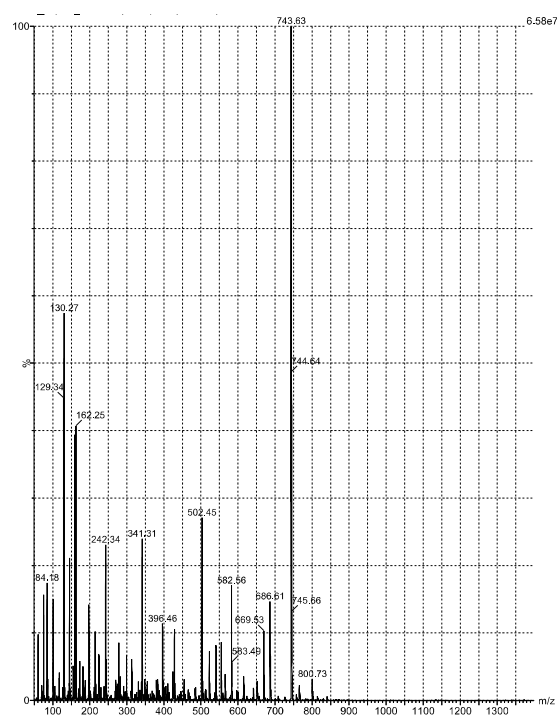

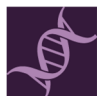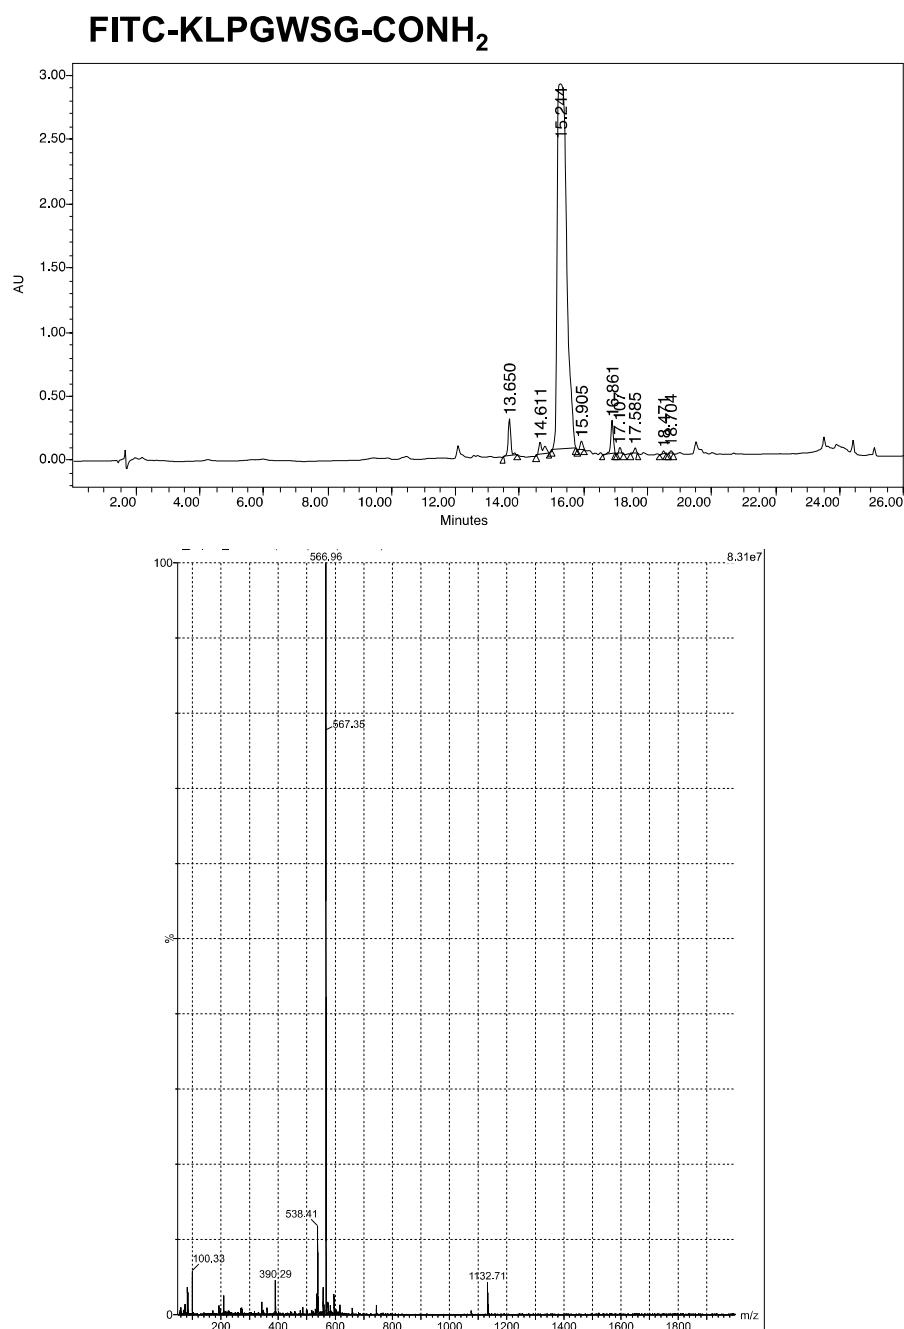

**Supplementary Figure S8: HPLC and LC-MS analyses of LDLK12, KLPGWSG and FITC-KLPGWSG.** LDLK12: LC-MS calc. = 1468.89 g/mol, obs. = 1468.04 g/mol. KLPGWSG: LC-MS calc. = 744.4 g/mol, obs. = 743.63 g/mol. FITC- KLPGWSG: LC-MS calc. = 1133.32 g/mol, obs. = 1132.71 g/mol.



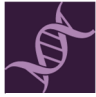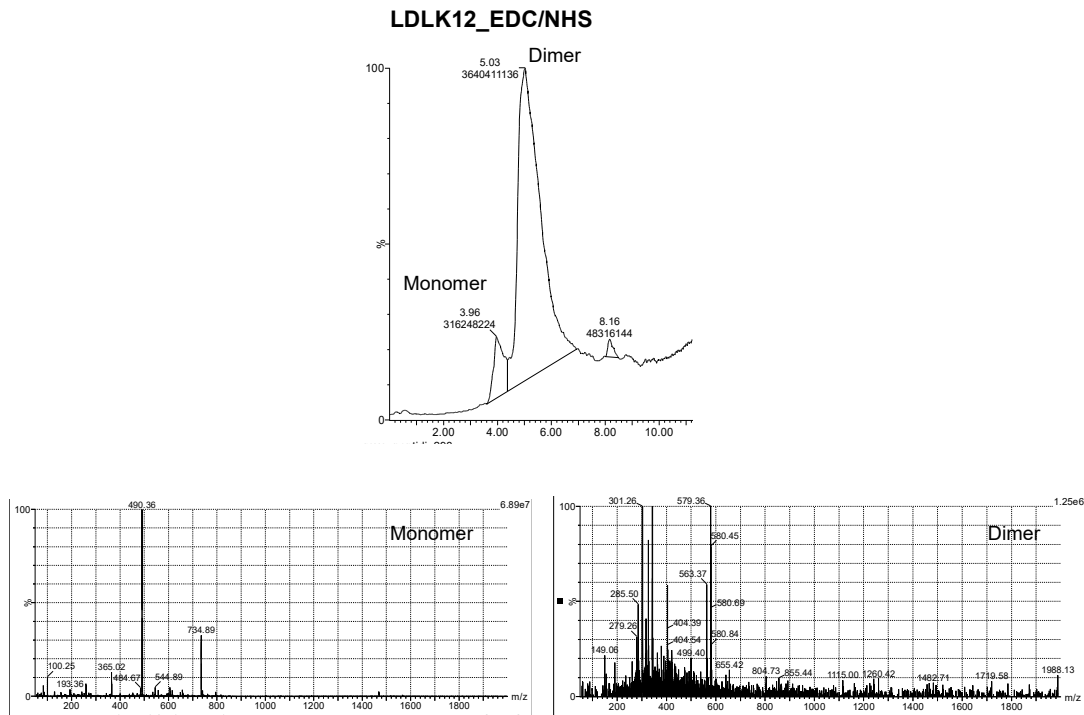

**Supplementary Figure S9: HPLC and LC-MS analyses of cross-linked LDLK12.** Monomer: LC-MS calc. = 734.95 g/mol, obs. = 734.89 g/mol. Dimer: LC-MS calc. = 2076 g/mol [1M+1H]<sup>+</sup>, 1438 g/mol [1M+2H]<sup>2+</sup> obs. = 1988.13 g/mol, 1482 g/mol. .

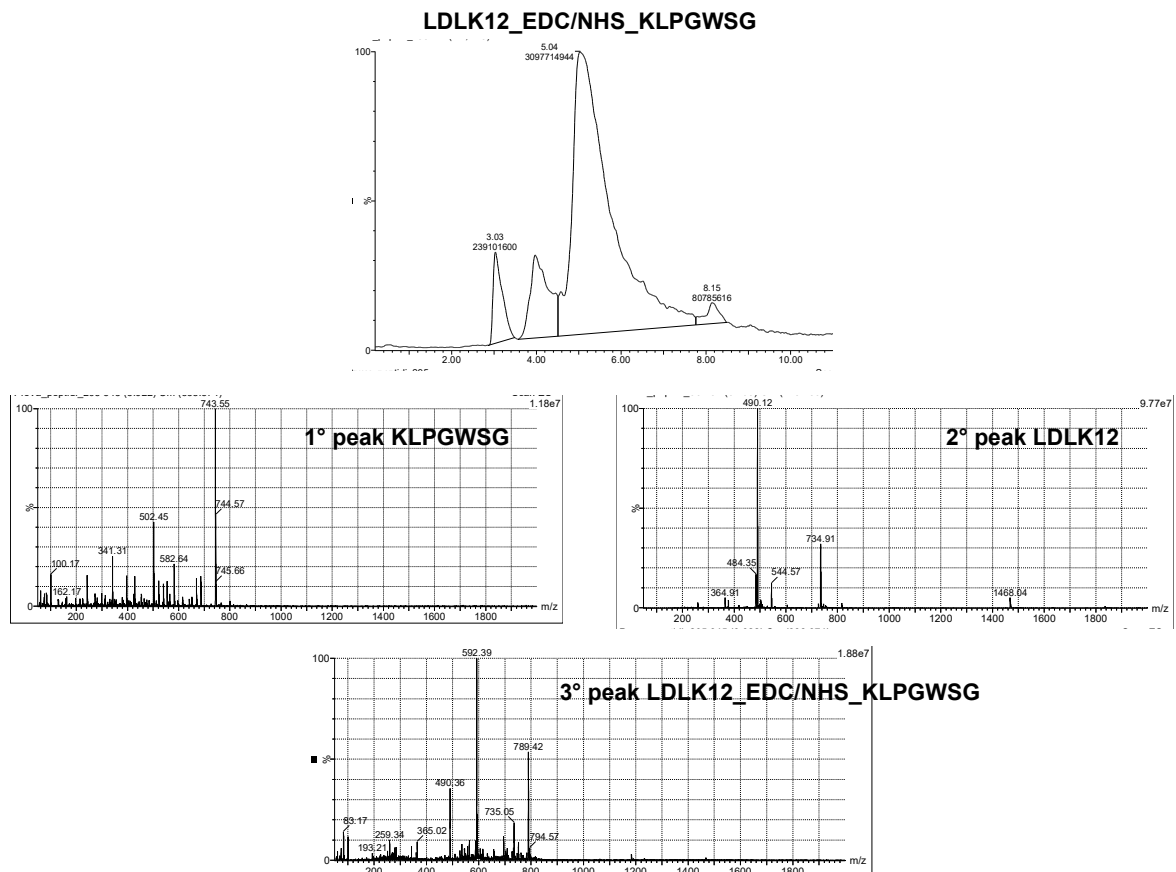

**Supplementary Figure S10: HPLC and LC-MS analyses of LDLK12 post-assembly functionalization with KLPGWSG.** 1°peak (KLPGWSG) LC-MS calc. = 744.4 g/mol, obs. = 743.55

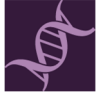

g/mol; 2° peak (LDLK12) LC-MS calc. = 1468.89 g/mol, obs. = 1468.04 g/mol; 3° peak (LDLK12\_EDC/sulfoNHS\_KLPGWSG) LC-MS calc. = 789.77 [1M + 4H]<sup>+</sup> 4 g/mol, obs. = 798.42 g/mol.

## Reference

60. Jordens, S.; Schwenke, K.; Usov, I.; Del Gado, E.; Mezzenga, R. Nematic field transfer in a two-dimensional protein fibril assembly. *Soft Matter* **2016**, *12*, 1830–1835.
61. Usov, I.; Mezzenga, R. FiberApp: An Open-Source Software for Tracking and Analyzing Polymers, Filaments, Biomacromolecules, and Fibrous Objects. *Macromolecules* **2015**, *48*, 1269–1280.
62. Jordens, S.; Isa, L.; Usov, I.; Mezzenga, R., Non-equilibrium nature of two-dimensional isotropic and nematic coexistence in amyloid fibrils at liquid interfaces. *Nature Commun.* **2013**, *4*, 1917.
